# Supplementary material for: Human presence impacts fungal diversity of inflated lunar/Mars analog habitat
Source: PubMed Central journal article supplement (PMC5504618; doi:10.1186/s40168-017-0280-8), 2017-07-11
Supplement: 40168_2017_280_MOESM5_ESM.pdf [file 40168_2017_280_MOESM5_ESM.pdf]

**Supplementary Table ST2: Statistical analysis to compare fungal populations of the different a) time points and b) locations**

a)

|                 | T <sub>0</sub> | T <sub>13</sub> | T <sub>20</sub> |
|-----------------|----------------|-----------------|-----------------|
| T <sub>13</sub> | 0.0995         |                 |                 |
| T <sub>20</sub> | 0.008          | 0.1213          |                 |
| T <sub>30</sub> | 0.0125         | 0.1391          | 0.4681          |

b)

|          | Bedroom | Kitchen | Lab    |
|----------|---------|---------|--------|
| Kitchen  | 0.1506  |         |        |
| Lab      | 0.0021  | 0.0707  |        |
| Bathroom | 0.1547  | 0.4653  | 0.1396 |
