# Supplementary material for: Human presence impacts fungal diversity of inflated lunar/Mars analog habitat
Source: PubMed Central journal article supplement (PMC5504618; doi:10.1186/s40168-017-0280-8), 2017-07-11

Stress = 0.10

● Day 0

● Day 13

● Day 20

● Day 30

● Day 0P

● Day 13P

● Day 20P

● Day 30P

all

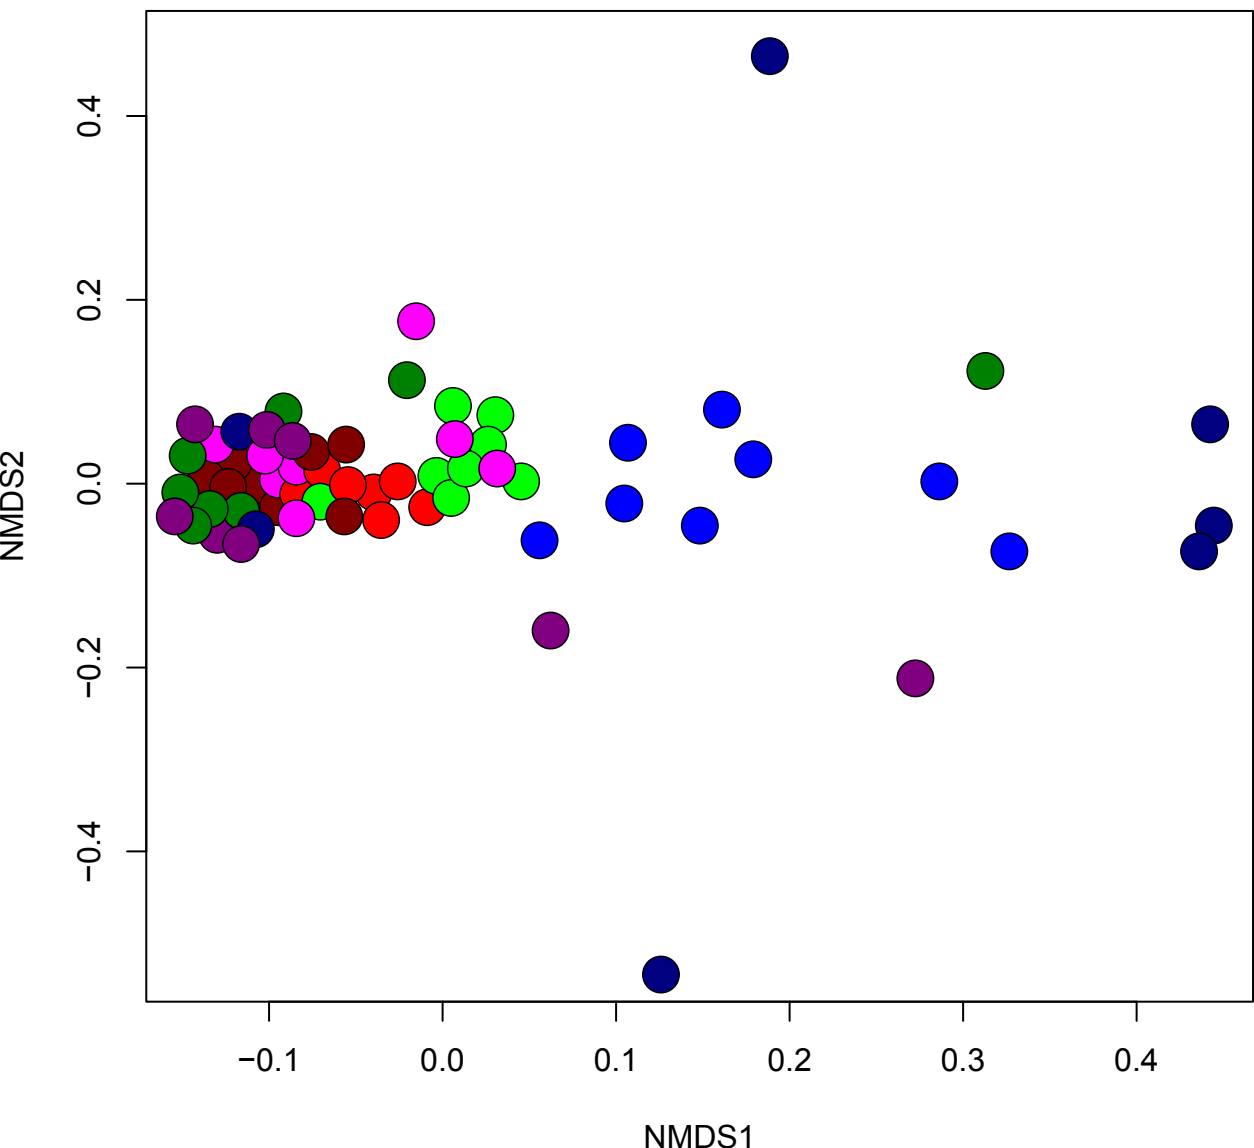

Supplement: 40168_2017_280_MOESM6_ESM.pdf [file 40168_2017_280_MOESM6_ESM.pdf]
