# Supplementary material for: Human presence impacts fungal diversity of inflated lunar/Mars analog habitat
Source: PubMed Central journal article supplement (PMC5504618; doi:10.1186/s40168-017-0280-8), 2017-07-11

Stress = 0.049

● Day 0P

● Day 13P

● Day 30P

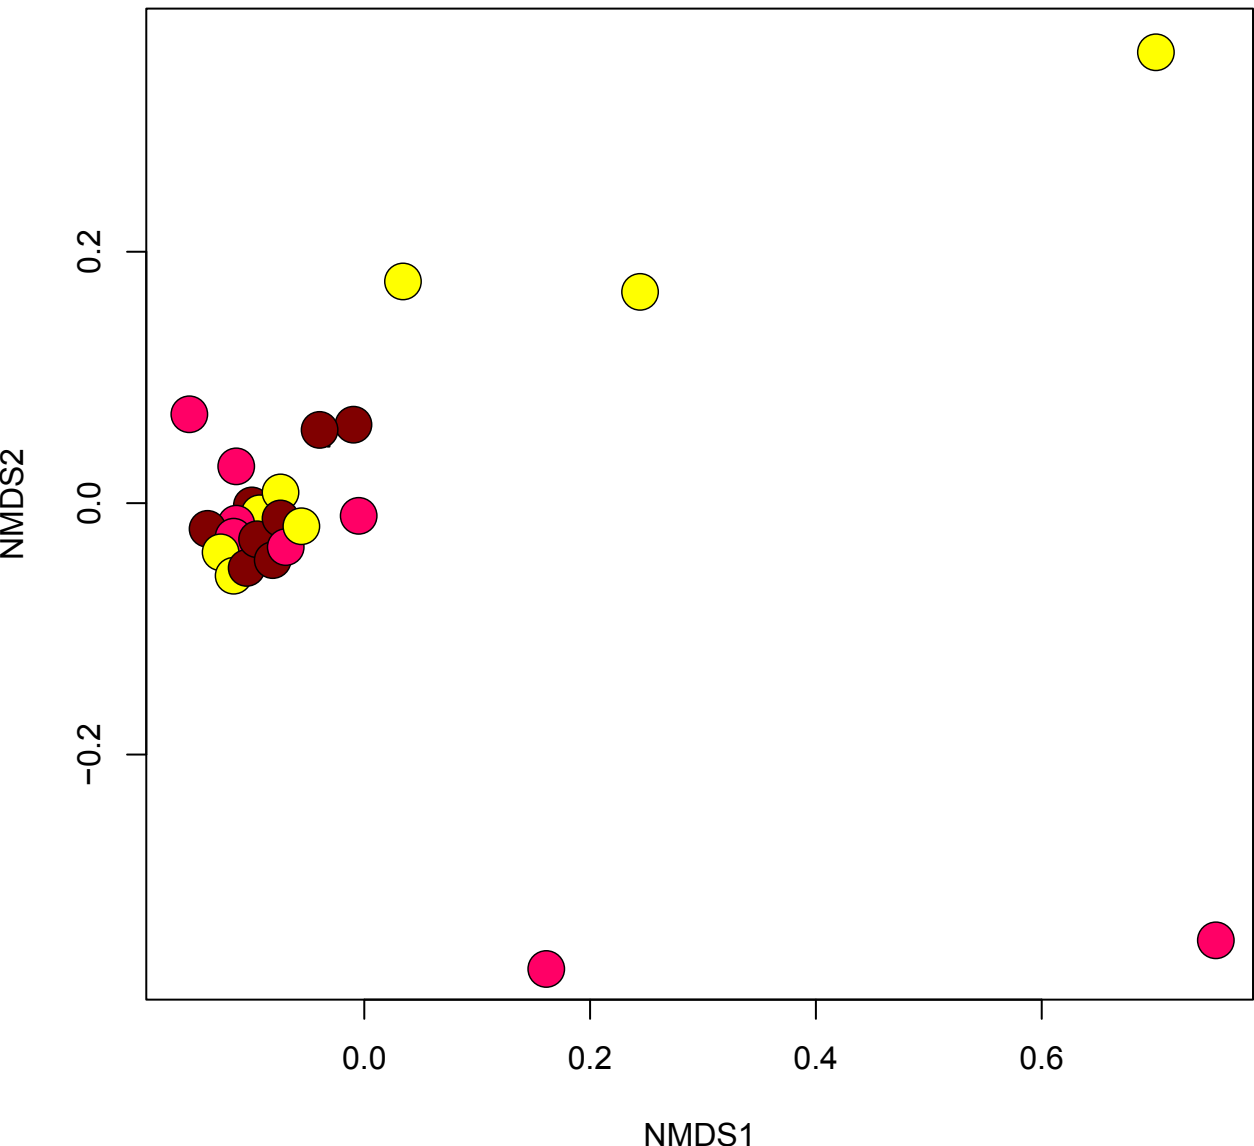

Supplement: 40168_2017_280_MOESM7_ESM.pdf [file 40168_2017_280_MOESM7_ESM.pdf]
