# Supplementary material for: Human presence impacts fungal diversity of inflated lunar/Mars analog habitat
Source: PubMed Central journal article supplement (PMC5504618; doi:10.1186/s40168-017-0280-8), 2017-07-11
Supplement: 40168_2017_280_MOESM8_ESM.pdf [file 40168_2017_280_MOESM8_ESM.pdf]

**Supplementary Table ST3: Statistical analysis of viable (PMA treated) samples to compare fungal populations of the different a) time points and b) locations**

a)

|                 | T <sub>0</sub> | T <sub>13</sub> | T <sub>20</sub> |
|-----------------|----------------|-----------------|-----------------|
| T <sub>13</sub> | 0.199          |                 |                 |
| T <sub>20</sub> | 0.005**        | 0.031*          |                 |
| T <sub>30</sub> | 0.059          | 0.443           | 0.044*          |

b)

|          | Bedroom | Kitchen | Lab |
|----------|---------|---------|-----|
| Kitchen  | 0.812   |         |     |
| Lab      | 0.642   | 0.804   |     |
| Bathroom | 0.753   | 0.488   |     |
